# Supplementary material for: Active Mobility and Environment: A Pilot Qualitative Study for the Design of a New Questionnaire
Source: PubMed Central journal article supplement (PMC5215579; doi:10.1371/journal.pone.0168986), 2017-01-04
Supplement: pone.0168986.s004.pdf [file pone.0168986.s004.pdf]

## QUESTIONNAIRES NAMES and REVIEWED ARTICLES (n=54)

### ALPHA (n=3)

[Link to the questionnaire](#)

1. Spittaels H, Verloigne M, Gidlow C, Gloanec J, Titze S, Foster C, Oppert J-M, Rutter H, Oja P, Sjöström M: **Measuring physical activity-related environmental factors: reliability and predictive validity of the European environmental questionnaire ALPHA**. *International Journal of Behavioral Nutrition and Physical Activity* 2010, **7**:48.
2. Wallmann B, Spittaels H, De Bourdeaudhuij I, Froboese I: **The perception of the neighborhood environment changes after participation in a pedometer based community intervention**. *Int J Behav Nutr Phys Act* 2012, **9**:33.
3. Wallmann-Sperlich B, Froboese I, Schantz P: **Physical Activity and the Perceived Neighbourhood Environment—Looking at the Association the Other Way Around**. *International journal of environmental research and public health* 2014, **11**:8093–8111.

### C4T (n=1)

[Link to the article describing the questionnaire](#)

1. Stronegger WJ, Titze S, Oja P: **Perceived characteristics of the neighborhood and its association with physical activity behavior and self-rated health**. *Health & place* 2010, **16**:736–743.

### IPS/IPAQ-E/PANES (n=6)

[Link to the questionnaire](#)

1. Ferrão MM, Gama A, Marques VR, Mendes LL, Mourão I, Nogueira H, Velásquez-Melendez G, Padez C: **Association between parental perceptions of residential neighbourhood environments and childhood obesity in Porto, Portugal**. *European journal of public health* 2013, **23**:1027–1031.
2. Mota J, Santos R, Pereira M, Teixeira L, Santos MP: **Perceived neighbourhood environmental characteristics and physical activity according to socioeconomic status in adolescent girls**. *Annals of human biology* 2011, **38**:1–6.
3. Oliveira A, Mota J, Moreira C, Vale S, Abreu S, Moreira P, Santos RM: **Adolescents' perception of environmental features and its association with physical activity: results from de Azorean Physical Activity and Health Study II**. *J Phys Act Health* 2014, **11**:917–921.
4. Rodríguez-Romo G, Garrido-Muñoz M, Lucía A, Mayorga JI, Ruiz JR: **Association between the characteristics of the neighborhood environment and physical activity**. *Gaceta Sanitaria* 2013, **27**:487–493.
5. Santos MR, Vale MS, Miranda L, Mota J: **Socio-demographic and perceived environmental correlates of walking in Portuguese adults—A multilevel analysis**. *Health & place* 2009, **15**:1094–1099.
6. Wallmann B, Bucksch J, Froboese I: **The association between physical activity and perceived environment in German adults**. *The European Journal of Public Health* 2012, **22**:502–508.

### NEWS (n=20)

[Link to the questionnaire](#)

1. Arvidsson D, Kawakami N, Ohlsson H, Sundquist K: **Physical activity and concordance between objective and perceived walkability**. *Med Sci Sports Exerc* 2012, **44**:280–7.
2. Cerin E, Cain KL, Conway TL, Van Dyck D, Hinckson E, Schipperijn J, De Bourdeaudhuij I, Owen N, Davey RC, Hino AAF: **Neighborhood environments and objectively measured physical activity in 11 countries**. *Med Sci Sports Exerc* 2014, **46**:2253–64.
3. Cerin E, Conway TL, Cain KL, Kerr J, De Bourdeaudhuij I, Owen N, Reis RS, Sarmiento OL, Hinckson EA, Salvo D: **Sharing good NEWS across the world: developing comparable scores across 12 countries for the Neighborhood Environment Walkability Scale (NEWS)**. *BMC Public Health* 2013, **13**:309.
4. De Bourdeaudhuij I, Van Dyck D, Salvo D, Davey R, Reis RS, Schofield G, Sarmiento OL, Mitas J, Christiansen LB, MacFarlane D: **International study of perceived neighbourhood environmental attributes and Body Mass Index: IPEN Adult study in 12 countries**. *International Journal of Behavioral Nutrition and Physical Activity* 2015, **12**:62.
5. Deforche B, Van Dyck D, Verloigne M, De Bourdeaudhuij I: **Perceived social and physical environmental correlates of physical activity in older adolescents and the moderating effect of self-efficacy**. *Preventive medicine* 2010, **50**:S24–S29.

6. Dewulf B, Neutens T, Van Dyck D, De Bourdeaudhuij I, Van de Weghe N: **Correspondence between objective and perceived walking times to urban destinations: Influence of physical activity, neighbourhood walkability, and socio-demographics.** *Int J Health Geogr* 2012, **11**:43.
7. Kaczynski AT, Glover TD: **Talking the talk, walking the walk: examining the effect of neighbourhood walkability and social connectedness on physical activity.** *Journal of public health* 2012:fds011.
8. Mäki-Opas TE, de Munter J, Maas J, Hertog F den, Kunst AE: **The association between physical environment and cycling to school among Turkish and Moroccan adolescents in Amsterdam.** *International journal of public health* 2014, **59**:629–636.
9. Nelson NM, Woods CB: **Neighborhood perceptions and active commuting to school among adolescent boys and girls.** *Journal of physical activity & health* 2010, **7**:257.
10. Owen N, De De Bourdeaudhuij I, Sugiyama T, Leslie E, Cerin E, Van Van Dyck D, Bauman A: **Bicycle use for transport in an Australian and a Belgian city: associations with built-environment attributes.** *Journal of urban health* 2010, **87**:189–198.
11. Rottmann M, Mielck A: **['Walkability' and physical activity—results of empirical studies based on the 'Neighbourhood Environment Walkability Scale (NEWS)'].** *Gesundheitswesen (Bundesverband der Ärzte des Öffentlichen Gesundheitsdienstes (Germany))* 2014, **76**:108–115.
12. Sugiyama T, Cerin E, Owen N, Oyeyemi AL, Conway TL, Van Dyck D, Schipperijn J, Macfarlane DJ, Salvo D, Reis RS: **Perceived neighbourhood environmental attributes associated with adults' recreational walking: IPEN Adult study in 12 countries.** *Health & place* 2014, **28**:22–30.
13. Van Cauwenberg J, De Bourdeaudhuij I, De Meester F, Van Dyck D, Salmon J, Clarys P, Deforche B: **Relationship between the physical environment and physical activity in older adults: a systematic review.** *Health & place* 2011, **17**:458–469.
14. Van Dyck D, Cardon G, Deforche B, Giles-Corti B, Sallis JF, Owen N, De Bourdeaudhuij I: **Environmental and psychosocial correlates of accelerometer-assessed and self-reported physical activity in Belgian adults.** *International journal of behavioral medicine* 2011, **18**:235–245.
15. Van Dyck D, Cerin E, Cardon G, Deforche B, Sallis JF, Owen N, De Bourdeaudhuij I: **Physical activity as a mediator of the associations between neighborhood walkability and adiposity in Belgian adults.** *Health & place* 2010, **16**:952–960.
16. Van Dyck D, Cerin E, Conway TL, De Bourdeaudhuij I, Owen N, Kerr J, Cardon G, Frank LD, Saelens BE, Sallis JF: **Associations between perceived neighborhood environmental attributes and adults' sedentary behavior: findings from the USA, Australia and Belgium.** *Social science & medicine* 2012, **74**:1375–1384.
17. Van Dyck D, Cerin E, Conway TL, De Bourdeaudhuij I, Owen N, Kerr J, Cardon G, Frank LD, Saelens BE, Sallis JF: **Perceived neighborhood environmental attributes associated with adults' transport-related walking and cycling: Findings from the USA, Australia and Belgium.** *Int J Behav Nutr Phys Act* 2012, **9**:1–14.
18. Van Dyck D, Cerin E, Conway TL, De Bourdeaudhuij I, Owen N, Kerr J, Cardon G, Frank LD, Saelens BE, Sallis JF: **Perceived neighborhood environmental attributes associated with adults' leisure-time physical activity: findings from Belgium, Australia and the USA.** *Health & place* 2013, **19**:59–68.
19. Van Dyck D, De Meester F, Cardon G, Deforche B, De Bourdeaudhuij I: **Physical environmental attributes and active transportation in Belgium: what about adults and adolescents living in the same neighborhoods?** *Health Promotion* 2013, **27**:330–338.
20. Van Kann DHH, Kremers SPJ, Gubbels JS, Bartelink NHM, De Vries SI, de Vries NK, Jansen MWJ: **The association between the physical environment of primary schools and active school transport.** *Environment and Behavior* 2014:0013916513519644.

**NPAQ (n=1)**  
[Link to the questionnaire](#)

**PENS (n=1)**  
[Link to the questionnaire](#)

1. Van Dyck D, Cardon G, Deforche B, De Bourdeaudhuij I: **Urban–rural differences in physical activity in Belgian adults and the importance of psychosocial factors.** *Journal of Urban Health* 2011, **88**:154–167.

1. Adams EJ, Goodman A, Sahlqvist S, Bull FC, Ogilvie D: **Correlates of walking and cycling for transport and recreation: factor structure, reliability and behavioural associations of the**

perceptions of the environment in the neighbourhood scale (PENS). *Int J Behav Nutr Phys Act* 2013, **10**.

|                                                         |                                                                                                                                                                                                                                                                                                                                                                                                                                                     |
|---------------------------------------------------------|-----------------------------------------------------------------------------------------------------------------------------------------------------------------------------------------------------------------------------------------------------------------------------------------------------------------------------------------------------------------------------------------------------------------------------------------------------|
| TPAQ (n=1)<br><a href="#">Link to the questionnaire</a> | 1. Adams EJ, Goad M, Sahlqvist S, Bull FC, Cooper AR, Ogilvie D, Consortium iConnect: <b>Reliability and Validity of the Transport and Physical Activity Questionnaire (TPAQ) for Assessing Physical Activity Behaviour</b> . 2014.                                                                                                                                                                                                                 |
| NN1 (n=1)<br><a href="#">Link to the article</a>        | 1. Van Dyck D, Cardon G, Deforche B, Owen N, De Bourdeaudhuij I: <b>Relationships between neighborhood walkability and adults' physical activity: How important is residential self-selection?</b> <i>Health &amp; place</i> 2011, <b>17</b> :1011–1014.                                                                                                                                                                                            |
| NN2 (n=1)<br><a href="#">Link to the items</a>          | 1. Van Dyck D, Veitch J, De Bourdeaudhuij I, Thornton L, Ball K: <b>Environmental perceptions as mediators of the relationship between the objective built environment and walking among socio-economically disadvantaged women</b> . <i>Int J Behav Nutr Phys Act</i> 2013, <b>10</b> :10.1186.                                                                                                                                                    |
| NN3 (n=1)<br><a href="#">Link to the article</a>        | 1. Van Cauwenberg J, De Donder L, Clarys P, De Bourdeaudhuij I, Buffel T, De Witte N, Dury S, Verté D, Deforche B: <b>Relationships between the perceived neighborhood social environment and walking for transportation among older adults</b> . <i>Social Science &amp; Medicine</i> 2014, <b>104</b> :23–30.                                                                                                                                     |
| NN4 (n=1)<br><a href="#">Link to the article</a>        | 1. Van Cauwenberg J, Clarys P, De Bourdeaudhuij I, Van Holle V, Verté D, De Witte N, De Donder L, Buffel T, Dury S, Deforche B: <b>Physical environmental factors related to walking and cycling in older adults: the Belgian aging studies</b> . <i>BMC public health</i> 2012, <b>12</b> :142.                                                                                                                                                    |
| NN5 (n=1)<br><a href="#">Link to the article</a>        | 1. Van Cauwenberg J, Clarys P, De Bourdeaudhuij I, Van Holle V, Verté D, De Witte N, De Donder L, Buffel T, Dury S, Deforche B: <b>Older adults' transportation walking: a cross-sectional study on the cumulative influence of physical environmental factors</b> . <i>International journal of health geographics</i> 2013, <b>12</b> :37–37.                                                                                                     |
| NN6 (n=1)<br><a href="#">Link to the article</a>        | 1. Toftager M, Ekholm O, Schipperijn J, Stigsdotter U, Bentsen P, Gronbaek M, Randrup TB, Kamper-Jorgensen F: <b>Distance to green space and physical activity: a Danish national representative survey</b> . <i>J Phys Act Health</i> 2011, <b>8</b> :741–749.                                                                                                                                                                                     |
| NN7 (n=1)<br><a href="#">Link to the items</a>          | 1. Panter J, Corder K, Griffin SJ, Jones AP, van Sluijs EM: <b>Individual, socio-cultural and environmental predictors of uptake and maintenance of active commuting in children: longitudinal results from the SPEEDY study</b> . <i>Int J Behav Nutr Phys Act</i> 2013, <b>10</b> :83.                                                                                                                                                            |
| NN8 (n=1)<br><a href="#">Link to the article</a>        | 1. Nevelsteen K, Steenberghen T, Van Rompaey A, Uyttersprot L: <b>Controlling factors of the parental safety perception on children's travel mode choice</b> . <i>Accident Analysis &amp; Prevention</i> 2012, <b>45</b> :39–49.                                                                                                                                                                                                                    |
| NN9 (n=1)<br><a href="#">Link to the article</a>        | 1. Lindelöw D, Svensson Å, Sternudd C, Johansson M: <b>What limits the pedestrian? Exploring perceptions of walking in the built environment and in the context of every-day life</b> . <i>Journal of Transport &amp; Health</i> 2014, <b>1</b> :223–231.                                                                                                                                                                                           |
| NN10 (n=1)<br><a href="#">Link to the article</a>       | 1. Kamphuis CB, Mackenbach JP, Giskes K, Huisman M, Brug J, Van Lenthe FJ: <b>Why do poor people perceive poor neighbourhoods? The role of objective neighbourhood features and psychosocial factors</b> . <i>Health &amp; place</i> 2010, <b>16</b> :744–754.                                                                                                                                                                                      |
| NN11 (n=1)<br><a href="#">Link to the article</a>       | 1. Haybatollahi M, Czepkiewicz M, Laatikainen T, Kyttä M: <b>Neighbourhood preferences, active travel behaviour, and built environment: an exploratory study</b> . <i>Transportation research part F: traffic psychology and behaviour</i> 2015, <b>29</b> :57–69.                                                                                                                                                                                  |
| NN12 (n=1)<br><a href="#">Link to the article</a>       | 1. Gidlow C, Cochrane T, Davey RC, Smith G, Fairburn J: <b>Relative importance of physical and social aspects of perceived neighbourhood environment for self-reported health</b> . <i>Preventive medicine</i> 2010, <b>51</b> :157–163.                                                                                                                                                                                                            |
| NN13 (n=1)<br><a href="#">Link to the article</a>       | 1. Engbers LH, Hendriksen IJ: <b>Characteristics of a population of commuter cyclists in the Netherlands: perceived barriers and facilitators in the personal, social and physical environment</b> . <i>Int J Behav Nutr Phys Act</i> 2010, <b>7</b> :89–93.                                                                                                                                                                                        |
| NN14 (n=1)<br><a href="#">Link to the article</a>       | 1. Aarts M-J, Mathijssen JJ, van Oers JA, Schuit AJ: <b>Associations between environmental characteristics and active commuting to school among children: a cross-sectional study</b> . <i>International journal of behavioral medicine</i> 2013, <b>20</b> :538–555.                                                                                                                                                                               |
| NN15 (n=2)<br><a href="#">Link to the article</a>       | 1. Ducheyne F, De Bourdeaudhuij I, Lenoir M, Cardon G: <b>Test-retest reliability and validity of a child and parental questionnaire on specific determinants of cycling to school</b> . <i>Pediatric exercise science</i> 2012, <b>24</b> :289.<br><br>2. Ducheyne F, De Bourdeaudhuij I, Spittaels H, Cardon G: <b>Individual, social and physical environmental correlates of "never" and "always" cycling to school among 10 to 12 year old</b> |

children living within a 3.0 km distance from school. *International journal of behavioral nutrition and physical activity* 2012, **9**:142.

NN16 (n=1)

[Link to the article](#)

1. Aditjandra P, Mulley C, Nelson J: **Extent to Which Sustainable Travel to Work Can Be Explained by Neighborhood Design Characteristics**. *Transportation Research Record: Journal of the Transportation Research Board* 2009:114–122.

NN17 (n=1)

[Link to the article](#)

1. Carver A, Panter JR, Jones AP, van Sluijs EM: **Independent mobility on the journey to school: A joint cross-sectional and prospective exploration of social and physical environmental influences**. *Journal of transport & health* 2014, **1**:25–32.

NN18 (n=1)

[Link to the article](#)

1. Christiansen LB, Toftager M, Schipperijn J, Ersbøll AK, Giles-Corti B, Troelsen J: **School site walkability and active school transport—association, mediation and moderation**. *Journal of transport geography* 2014, **34**:7–15.

NN19 (n=1)

[Link to the article](#)

1. Van Acker V, Derudder B, Witlox F: **Why people use their cars while the built environment imposes cycling**. *Journal of Transport and Land Use* 2013, **6**:53–62.

NN20 (n=1)

[Link to the article](#)

1. Molina-García J, Castillo I, Sallis JF: **Psychosocial and environmental correlates of active commuting for university students**. *Preventive medicine* 2010, **51**:136–138.
